# Supplementary material for: Tracking the formation of new brominated disinfection by-products during the seawater desalination process
Source: Royal Society of Chemistry journal article supplement (doi:10.1039/d0ew00426j), 2020-01-01
Supplement: d0ew00426j1.pdf [file d0ew00426j1.pdf]

## Supplementary Information

### Tracking the formation of new brominated disinfection by-products during the seawater desalination process

Leanne C. Powers<sup>1</sup>, Annaleise Conway<sup>1</sup>, Carys L. Mitchelmore<sup>1</sup>, Stephen J. Fleischacker<sup>2</sup>, Mourad Harir<sup>3</sup>, Danielle C. Westerman<sup>4</sup>, Jean Philippe Croué<sup>5</sup>, Philippe Schmitt-Kopplin<sup>3,6</sup>, Susan D. Richardson<sup>4</sup>, and Michael Gonsior<sup>1</sup>

<sup>1</sup>University of Maryland Center for Environmental Science, Chesapeake Biological Laboratory, Solomons, MD, 20688 USA.

<sup>2</sup>Tampa Bay Water, Clearwater, FL, 33763 USA.

<sup>3</sup>Helmholtz Zentrum München, German Research Center for Environmental Health, Research Unit Analytical BioGeoChemistry, D-85764 Neuherberg, Germany

<sup>4</sup>Department of Chemistry and Biochemistry, University of South Carolina, Columbia, SC, 29208 USA

<sup>5</sup>Institut de Chimie des Milieux et des Matériaux IC2MP UMR 7285 CNRS, Université de Poitiers, 86073 Poitiers Cedex 9, France

<sup>6</sup>Technische Universität München, Chair of Analytical Food Chemistry, D-85354 Freising-Weihenstephan, Germany

Table S1. Filtered water sample characteristics before and after solid phase extraction (SPE). All averages are reported  $\pm$  standard error (n = 2). Abbreviation definitions are given below the table.

| Sample                                                                | ID                   | Before SPE |     |                           |                           |                                            |                             |                                   | Post SPE                  |                           |                                      | DOC Eff. (%) |
|-----------------------------------------------------------------------|----------------------|------------|-----|---------------------------|---------------------------|--------------------------------------------|-----------------------------|-----------------------------------|---------------------------|---------------------------|--------------------------------------|--------------|
|                                                                       |                      | Salinity   | pH  | DOC (mg L <sup>-1</sup> ) | TDN (mg L <sup>-1</sup> ) | SUVA (L mg <sup>-1</sup> m <sup>-1</sup> ) | $a(300)$ (m <sup>-1</sup> ) | $S_{300-500}$ (nm <sup>-1</sup> ) | DOC (mg L <sup>-1</sup> ) | TDN (mg L <sup>-1</sup> ) | OrganoBr ( $\mu$ g L <sup>-1</sup> ) |              |
| <b>Raw water</b>                                                      | RW                   | 21         | 7.4 | 4.3 $\pm$ 0.07            | 0.41 $\pm$ 0.06           | 2.8                                        | 12.5                        | 0.019                             | 2.1 $\pm$ 0.7             | BD                        | 23 $\pm$ 6                           | 50 $\pm$ 17  |
| <b>Post pretreatment</b>                                              | PT                   | 21         | ND  | 3.9 $\pm$ 0.09            | 0.30 $\pm$ 0.06           | 1.9                                        | 6.3                         | 0.024                             | 1.5 $\pm$ 0.1             | BD                        | 330 $\pm$ 40                         | 38 $\pm$ 3   |
| <b>Reject (brine) water</b>                                           | BW                   | 60         | 7.8 | 10 $\pm$ 0.2              | 0.68 $\pm$ 0.06           | 1.9                                        | 17.6                        | 0.024                             | 4.9 $\pm$ 1.2             | BD                        | 570 $\pm$ 40                         | 48 $\pm$ 13  |
| <b>RO permeate</b>                                                    | ROP                  | 0          | ND  | BD                        | BD                        | BD                                         | 0.2                         | ND                                | BD                        | BD                        | BD                                   |              |
| <b>Drinking water</b>                                                 | DW                   | 0          | 7.5 | BD                        | BD                        | BD                                         | 2.5                         | ND                                | BD                        | BD                        | 7 $\pm$ 5                            |              |
| <b>RW + Cl<sub>2</sub></b>                                            |                      |            |     | 3.9 $\pm$ 0.04            | BD                        | 1.8                                        | 4.7                         | 0.029                             | ND                        | ND                        | ND                                   |              |
| <b>RW + Cl<sub>2</sub> + Na<sub>2</sub>S<sub>2</sub>O<sub>3</sub></b> | RW + Cl <sub>2</sub> |            |     | 4.1 $\pm$ 0.06            | BD                        | 1.8                                        | 4.8                         | 0.023                             | ND                        | ND                        | 310 $\pm$ 20                         |              |

DOC: dissolved organic carbon

TDN: total dissolved nitrogen

SUVA: specific UV absorbance, or absorbance at 254 nm normalized to pathlength (L, m) and DOC concentration  $A(254)/(L \times \text{DOC})$

$a(300)$ : the absorption coefficient at 300 nm determined using Equation 1.

$S_{300-500}$ : the spectral slope of  $\ln(a(\lambda))$  versus wavelength, determined between 300 and 500 nm.

OrganoBr: total extractable organic bromine

DOC Eff.: extraction efficiency for DOC using PPL and WAX cartridges, or  $100 \times (\text{DOC}_{\text{post SPE}} / \text{DOC}_{\text{before SPE}})$

BD: below detection

ND: not determined

Table S2. Intensity-weighted (wt) average ( $\pm$  standard error) molecular characteristics of water samples extracted using a PPL (top) and WAX (bottom) solid phase extraction procedure and analyzed using FT-ICR-MS. These characteristics were determined for assigned molecular compositions containing only carbon, hydrogen, and oxygen (CHO), CHO + nitrogen (CHNO) assignments, CHO + sulfur (CHOS) assignments, CHO + bromine (CHOBr) assignments, CHNO + bromine (CHNOBr) assignments, and CHOS + bromine (CHOSBr) assignments. CHO, CHNO, and CHOS formulas that were found only in raw water PPL extracts (unique RW) and only in reject/brine water PPL extracts (unique BW) are also listed. Abbreviation definitions are given below the table.

| <i>PPL extracts</i>             | <b>MW<sub>wt</sub> (Da)</b> | <b>O/C<sub>wt</sub></b> | <b>H/C<sub>wt</sub></b> | <b>DBE<sub>wt</sub></b> | <b>Cos<sub>wt</sub></b> |
|---------------------------------|-----------------------------|-------------------------|-------------------------|-------------------------|-------------------------|
| <b>CHO assignments</b>          |                             |                         |                         |                         |                         |
| RW (n = 1908)                   | 464.0 $\pm$ 89              | 0.49 $\pm$ 0.11         | 1.16 $\pm$ 0.20         | 10.2 $\pm$ 2.4          | -0.18 $\pm$ 0.34        |
| Unique RW (n = 70)              | 553.0 $\pm$ 89              | 0.44 $\pm$ 0.09         | 0.83 $\pm$ 0.21         | 17.0 $\pm$ 2.4          | 0.06 $\pm$ 0.38         |
| PT (n = 1160)                   | 463.6 $\pm$ 94              | 0.55 $\pm$ 0.12         | 1.13 $\pm$ 0.20         | 10.1 $\pm$ 2.6          | -0.03 $\pm$ 0.36        |
| RW + Cl <sub>2</sub> (n = 1583) | 426.4 $\pm$ 84              | 0.50 $\pm$ 0.12         | 1.16 $\pm$ 0.19         | 9.3 $\pm$ 2.2           | -0.16 $\pm$ 0.34        |
| BW (n = 1754)                   | 462.3 $\pm$ 82              | 0.52 $\pm$ 0.13         | 1.17 $\pm$ 0.20         | 9.9 $\pm$ 2.1           | -0.14 $\pm$ 0.37        |
| Unique BW (n = 53)              | 482.2 $\pm$ 145             | 0.71 $\pm$ 0.12         | 1.25 $\pm$ 0.23         | 8.5 $\pm$ 3.1           | 0.18 $\pm$ 0.33         |
| <b>CHNO assignments</b>         |                             |                         |                         |                         |                         |
| RW (n = 1293)                   | 471.2 $\pm$ 75              | 0.47 $\pm$ 0.09         | 1.13 $\pm$ 0.18         | 10.1 $\pm$ 2.4          | 0.05 $\pm$ 0.28         |
| Unique RW (n = 114)             | 450.0 $\pm$ 66              | 0.44 $\pm$ 0.08         | 0.94 $\pm$ 0.18         | 13.2 $\pm$ 2.0          | 0.22 $\pm$ 0.31         |
| PT (n = 723)                    | 428.8 $\pm$ 81              | 0.53 $\pm$ 0.09         | 1.12 $\pm$ 0.18         | 10.1 $\pm$ 2.5          | 0.16 $\pm$ 0.29         |
| RW + Cl <sub>2</sub> (n = 1197) | 383.0 $\pm$ 68              | 0.48 $\pm$ 0.09         | 1.20 $\pm$ 0.18         | 8.7 $\pm$ 2.2           | 0.01 $\pm$ 0.30         |
| BW (n = 1439)                   | 422.1 $\pm$ 68              | 0.50 $\pm$ 0.10         | 1.15 $\pm$ 0.20         | 9.8 $\pm$ 2.2           | 0.07 $\pm$ 0.34         |
| BW unique (n = 252)             | 473.7 $\pm$ 113             | 0.55 $\pm$ 0.12         | 1.16 $\pm$ 0.19         | 10.5 $\pm$ 3.0          | 0.21 $\pm$ 0.36         |
| ROP (n = 31)                    | 329.8 $\pm$ 66              | 0.40 $\pm$ 0.13         | 1.42 $\pm$ 0.35         | 6.5 $\pm$ 3.3           | -0.38 $\pm$ 0.49        |
| DW (n = 37)                     | 338.7 $\pm$ 58              | 0.42 $\pm$ 0.15         | 1.55 $\pm$ 0.26         | 5.2 $\pm$ 2.6           | -0.51 $\pm$ 0.43        |
| <b>CHOS assignments</b>         |                             |                         |                         |                         |                         |
| RW (n = 400)                    | 392.1 $\pm$ 59              | 0.49 $\pm$ 0.11         | 1.27 $\pm$ 0.24         | 7.3 $\pm$ 2.3           | -0.17 $\pm$ 0.40        |
| RW unique (n = 17)              | 426.1 $\pm$ 48              | 0.39 $\pm$ 0.09         | 1.18 $\pm$ 0.42         | 9.3 $\pm$ 4.1           | -0.29 $\pm$ 0.53        |
| PT n = (557)                    | 423.0 $\pm$ 66              | 0.54 $\pm$ 0.11         | 1.29 $\pm$ 0.22         | 7.4 $\pm$ 2.2           | -0.09 $\pm$ 0.37        |
| RW + Cl <sub>2</sub> (n = 328)  | 370.9 $\pm$ 58              | 0.47 $\pm$ 0.14         | 1.39 $\pm$ 0.25         | 5.9 $\pm$ 2.2           | -0.32 $\pm$ 0.47        |
| BW (n = 562)                    | 409.3 $\pm$ 51              | 0.53 $\pm$ 0.15         | 1.30 $\pm$ 0.22         | 7.1 $\pm$ 1.8           | -0.11 $\pm$ 0.48        |
| BW unique (n = 177)             | 468.6 $\pm$ 62              | 0.58 $\pm$ 0.10         | 1.33 $\pm$ 0.19         | 7.6 $\pm$ 2.4           | -0.06 $\pm$ 0.33        |
| ROP (n = 90)                    | 354.6 $\pm$ 27              | 0.28 $\pm$ 0.07         | 1.54 $\pm$ 0.14         | 4.0 $\pm$ 1.0           | -0.91 $\pm$ 0.27        |
| DW (n = 62)                     | 360.4 $\pm$ 45              | 0.39 $\pm$ 0.12         | 1.17 $\pm$ 0.39         | 5.0 $\pm$ 1.8           | -0.24 $\pm$ 0.45        |
| <b>CHOBr assignments</b>        |                             |                         |                         |                         |                         |

|                                |                             |                         |                         |                         |                         |
|--------------------------------|-----------------------------|-------------------------|-------------------------|-------------------------|-------------------------|
| RW (n = 4)                     | 481.7 ± 100                 | 0.16 ± 0.06             | 1.21 ± 0.48             | 10.1 ± 6.1              | -0.85 ± 0.45            |
| PT (n = 384)                   | 447.8 ± 86                  | 0.54 ± 0.10             | 1.10 ± 0.40             | 8.1 ± 5.2               | 0.04 ± 0.43             |
| RW + Cl <sub>2</sub> (n = 379) | 476.1 ± 81                  | 0.48 ± 0.09             | 1.19 ± 0.32             | 7.1 ± 4.0               | -0.16 ± 0.38            |
| BW (n = 392)                   | 450.6 ± 55                  | 0.53 ± 0.11             | 1.12 ± 0.19             | 8.1 ± 1.9               | -0.01 ± 0.34            |
| <b>CHNOBr assignments</b>      |                             |                         |                         |                         |                         |
| RW (n = 1)                     | 398.0                       | 0.40                    | 1.00                    | 8                       | 0.46                    |
| PT (n = 1)                     | 373.0                       | 0.54                    | 0.92                    | 9                       | 0.27                    |
| RW + Cl <sub>2</sub> (n = 31)  | 398.1 ± 31                  | 0.44 ± 0.10             | 1.05 ± 0.12             | 8.5 ± 1.9               | 0.21 ± 0.15             |
| BW (n = 10)                    | 404.7 ± 58                  | 0.47 ± 0.11             | 1.03 ± 0.11             | 8.6 ± 2.3               | 0.34 ± 0.16             |
| <b>CHOSBr assignments</b>      |                             |                         |                         |                         |                         |
| RW (n = 0)                     | -                           | -                       | -                       | -                       | -                       |
| PT (n = 108)                   | 448.5 ± 59                  | 0.41 ± 0.08             | 1.22 ± 0.18             | 7.2 ± 2.1               | -0.21 ± 0.31            |
| RW + Cl <sub>2</sub> (n = 80)  | 429.9 ± 42                  | 0.38 ± 0.08             | 1.29 ± 0.17             | 6.2 ± 1.6               | -0.34 ± 0.30            |
| BW (n = 107)                   | 453.8 ± 58                  | 0.39 ± 0.07             | 1.23 ± 0.18             | 7.2 ± 2.1               | -0.26 ± 0.30            |
| <b>WAX extracts</b>            |                             |                         |                         |                         |                         |
|                                | <b>MW<sub>wt</sub> (Da)</b> | <b>O/C<sub>wt</sub></b> | <b>H/C<sub>wt</sub></b> | <b>DBE<sub>wt</sub></b> | <b>Cos<sub>wt</sub></b> |
| <b>CHO assignments</b>         |                             |                         |                         |                         |                         |
| RW (n = 333)                   | 399.1 ± 72                  | 0.74 ± 0.10             | 0.94 ± 0.18             | 9.6 ± 2.4               | 0.54 ± 0.31             |
| PT (n = 263)                   | 374.0 ± 77                  | 0.77 ± 0.13             | 0.92 ± 0.21             | 9.0 ± 2.2               | 0.63 ± 0.40             |
| RW + Cl <sub>2</sub> (n = 135) | 364.8 ± 69                  | 0.77 ± 0.10             | 0.94 ± 0.21             | 8.6 ± 1.9               | 0.60 ± 0.34             |
| BW (n = 428)                   | 378.6 ± 75                  | 0.73 ± 0.12             | 0.97 ± 0.22             | 8.9 ± 2.4               | 0.49 ± 0.37             |
| <b>CHNO assignments</b>        |                             |                         |                         |                         |                         |
| RW (n = 266)                   | 373.6 ± 62                  | 0.66 ± 0.09             | 0.94 ± 0.16             | 9.6 ± 1.9               | 0.61 ± 0.22             |
| PT (n = 348)                   | 362.6 ± 64                  | 0.68 ± 0.09             | 0.99 ± 0.19             | 9.0 ± 2.0               | 0.60 ± 0.24             |
| RW + Cl <sub>2</sub> (n = 75)  | 354.0 ± 52                  | 0.72 ± 0.07             | 0.99 ± 0.16             | 8.5 ± 1.5               | 0.67 ± 0.20             |
| BW (n = 378)                   | 363.4 ± 63                  | 0.66 ± 0.09             | 1.01 ± 0.20             | 8.9 ± 2.1               | 0.57 ± 0.25             |
| <b>CHOS assignments</b>        |                             |                         |                         |                         |                         |
| RW (n = 73)                    | 352.3 ± 117                 | 0.80 ± 0.37             | 0.72 ± 0.16             | 7.5 ± 2.4               | 1.36 ± 0.69             |
| PT (n = 60)                    | 327.2 ± 119                 | 0.89 ± 0.45             | 0.62 ± 0.19             | 7.6 ± 3.2               | 1.65 ± 0.80             |
| RW + Cl <sub>2</sub> (n = 21)  | 284.6 ± 110                 | 0.77 ± 0.45             | 0.44 ± 0.16             | 7.1 ± 2.3               | 1.85 ± 0.66             |
| BW (n = 128)                   | 330.7 ± 104                 | 0.80 ± 0.34             | 0.78 ± 0.20             | 7.1 ± 2.2               | 1.29 ± 0.68             |

MW<sub>wt</sub>: center of mass/molecular weight

O/C: oxygen to carbon ratio

H/C: hydrogen to carbon ratio.

DBE: double bond equivalent

Cos: average carbon oxidation state

Table S3. Br-containing formula assignments found in BW WAX extracts.

| Observed ionic mass ( <i>m/z</i> ) | Calculated Mass | Assigned Molecular Formula                                    | Potential structure                         |
|------------------------------------|-----------------|---------------------------------------------------------------|---------------------------------------------|
| 214.83479                          | 215.842152      | C <sub>2</sub> H <sub>2</sub> O <sub>2</sub> Br <sub>2</sub>  | Dibromoacetic acid                          |
| 268.84545                          | 269.852717      | C <sub>5</sub> H <sub>4</sub> O <sub>3</sub> Br <sub>2</sub>  | 3,5-dibromo-4-hydroxypenta-2,4-dienoic acid |
| 300.83527                          | 301.842547      | C <sub>5</sub> H <sub>4</sub> O <sub>5</sub> Br <sub>2</sub>  | 3,4-dibromo-4-hydroxypent-2-enedioic acid   |
| 234.92473                          | 235.932036      | C <sub>6</sub> H <sub>5</sub> O <sub>5</sub> Br               | 6-bromobenzene-1,2,3,4,5-pentol             |
| 248.94039                          | 249.947686      | C <sub>7</sub> H <sub>7</sub> O <sub>5</sub> Br               |                                             |
| 264.93533                          | 265.942601      | C <sub>7</sub> H <sub>7</sub> O <sub>6</sub> Br               |                                             |
| 276.89896                          | 277.906216      | C <sub>7</sub> H <sub>3</sub> O <sub>7</sub> Br               |                                             |
| 278.950925                         | 279.958251      | C <sub>8</sub> H <sub>9</sub> O <sub>6</sub> Br               |                                             |
| 292.93021                          | 293.937516      | C <sub>8</sub> H <sub>7</sub> O <sub>7</sub> Br               |                                             |
| 306.9095                           | 307.916781      | C <sub>8</sub> H <sub>5</sub> O <sub>8</sub> Br               |                                             |
| 306.9458825                        | 307.953166      | C <sub>9</sub> H <sub>9</sub> O <sub>7</sub> Br               |                                             |
| 334.9408367                        | 335.948081      | C <sub>10</sub> H <sub>9</sub> O <sub>8</sub> Br              |                                             |
| 376.9514167                        | 377.958646      | C <sub>12</sub> H <sub>11</sub> O <sub>9</sub> Br             |                                             |
| 430.96184                          | 431.969211      | C <sub>15</sub> H <sub>13</sub> O <sub>10</sub> Br            |                                             |
| 238.84609                          | 239.853385      | C <sub>3</sub> H <sub>2</sub> N <sub>2</sub> OBr <sub>2</sub> | dibromo-imidazole                           |
| 249.85084                          | 250.858136      | C <sub>5</sub> H <sub>3</sub> NOBr <sub>2</sub>               | dibromo-pyridone                            |
| 293.8407                           | 294.847966      | C <sub>6</sub> H <sub>3</sub> NO <sub>3</sub> Br <sub>2</sub> | 4,6-dibromo-5-hydroxypicolinic acid         |
| 275.91494                          | 276.9222        | C <sub>7</sub> H <sub>4</sub> NO <sub>6</sub> Br              |                                             |
| 250.80184                          | 251.8091377     | CH <sub>2</sub> Br <sub>2</sub> SO <sub>3</sub>               | dibromomethanesulfonic acid                 |
| 320.80731                          | 321.8146177     | C <sub>4</sub> H <sub>4</sub> SO <sub>5</sub> Br <sub>2</sub> |                                             |

Table S4. Summary of water quality parameters for brine water (BW) mysid toxicity test across all treatments.

| Water                |              | Temperature (°C) | Salinity (‰)  | Dissolved Oxygen (mg L <sup>-1</sup> ) | pH          |
|----------------------|--------------|------------------|---------------|----------------------------------------|-------------|
| New                  | Min - Max    | 25.6 - 26.9      | 22.26 - 22.90 | 6.29 - 6.98                            | 8.27 - 8.70 |
|                      | Average (SD) | 26.3 (0.29)      | 22.54 (0.17)  | 6.66 (0.13)                            | 8.51 (0.10) |
| Aged                 | Min - Max    | 24.5 - 26.9      | 22.00 - 24.17 | 3.89 - 5.92                            | 8.16 - 8.47 |
|                      | Average (SD) | 26.0 (0.59)      | 22.89 (0.32)  | 4.81 (0.53)                            | 8.31 (0.07) |
| Overall <sup>a</sup> | Average (SD) | 26.1 (0.54)      | 22.79 (0.32)  | 5.36 (0.97)                            | 8.37 (0.12) |

<sup>a</sup>Minimum and maximum values are not explicitly included as they are easily derived from new and aged solution ranges. SD = standard deviation.

Table S5. Summary of water quality parameters for receiving water (RW) mysid toxicity test across all treatments.

| <b>Water</b>   |              | <b>Temperature (°C)</b> | <b>Salinity (‰)</b> | <b>Dissolved Oxygen (mg L<sup>-1</sup>)</b> | <b>pH</b>   |
|----------------|--------------|-------------------------|---------------------|---------------------------------------------|-------------|
| <b>New</b>     | Min - Max    | 24.2 - 26.9             | 22.40 - 23.21       | 6.20 - 8.24                                 | 8.27 - 8.66 |
|                | Average (SD) | 26.0 (0.56)             | 22.75 (0.22)        | 6.86 (0.33)                                 | 8.47 (0.09) |
| <b>Aged</b>    | Min - Max    | 24.8 - 27.0             | 22.13 - 24.15       | 3.60 - 6.81                                 | 8.06 - 8.65 |
|                | Average (SD) | 26.0 (0.51)             | 23.08 (0.37)        | 4.86 (0.52)                                 | 8.29 (0.08) |
| <b>Overall</b> |              |                         |                     |                                             |             |
| <sup>a</sup>   | Average (SD) | 26.0 (0.53)             | 22.98 (0.36)        | 5.47 (1.04)                                 | 8.35 (0.11) |

<sup>a</sup>Minimum and maximum values are not explicitly included as they are easily derived from new and aged solution ranges. SD = standard deviation.

Table S6. Summary of toxicity endpoints for receiving water (RW) and brine water (BW) mysid toxicity tests.

| <b>Water</b> | <b>Endpoint</b> | <b>% Starting Concentration</b> |                                           |                        | <b>% BW or RW</b> |                        |                        |
|--------------|-----------------|---------------------------------|-------------------------------------------|------------------------|-------------------|------------------------|------------------------|
|              |                 | <b>NOEC</b>                     | <b>LC<sub>50</sub> or EC<sub>50</sub></b> | <b>IC<sub>25</sub></b> | <b>NOEC</b>       | <b>LC<sub>50</sub></b> | <b>IC<sub>25</sub></b> |
| <b>RW</b>    | Mortality       | >100                            | >100                                      | >100                   | >100              | >100                   | >100                   |
|              | Growth          | >100                            | >100                                      | >100                   | >100              | NA                     | >100                   |
| <b>BW</b>    | Mortality       | >100                            | >100                                      | >100                   | >36.5             | >36.5                  | >36.5                  |
|              | Growth          | >100                            | >100                                      | >100                   | >36.5             | NA                     | >36.5                  |

LC50 calculated for mortality endpoint and EC50 for growth endpoint

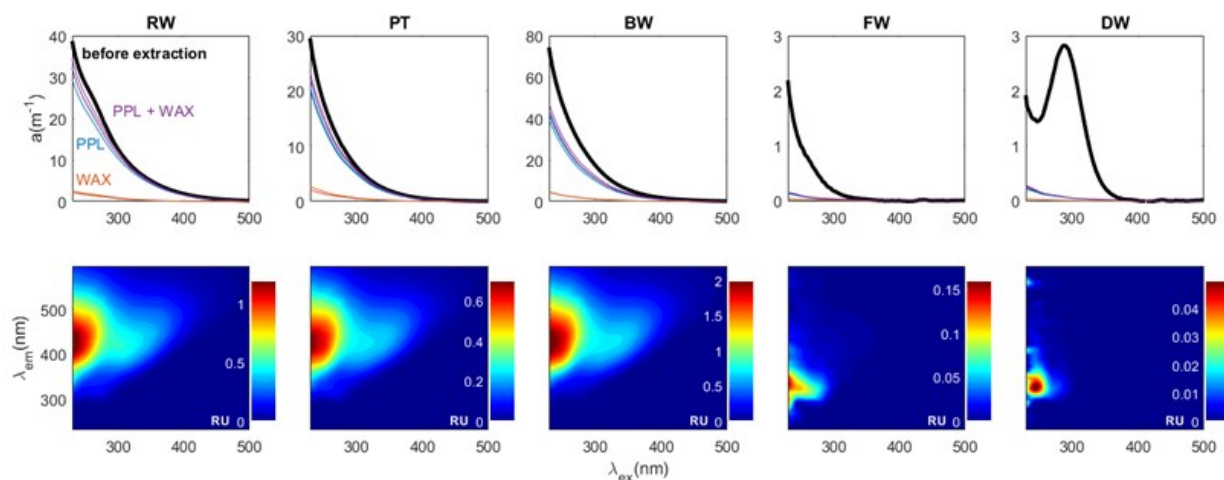

Figure S1. **(top)** Absorption spectra ( $a(m^{-1})$ ) for raw water (RW), post pretreatment water (PT), RO reject/brine water (BW), RO permeate (ROP), and chlorinated drinking water (DW). Note the difference in scale between samples. Black lines are samples prior to extraction, blue lines are  $a(m^{-1})$  spectra of PPL SPE-DOM samples, red lines are  $a(m^{-1})$  spectra of weak anion exchange (WAX) SPE-DOM samples and purple lines are the sum of PPL and WAX  $a(m^{-1})$  spectra. **(bottom)** Excitation-emission matrix spectra (EEMS) corresponding to water sample  $a(m^{-1})$  spectra (black lines) above. Note the difference in scale between samples SPE-DOM EEMS shown in Figures S2 and S3.

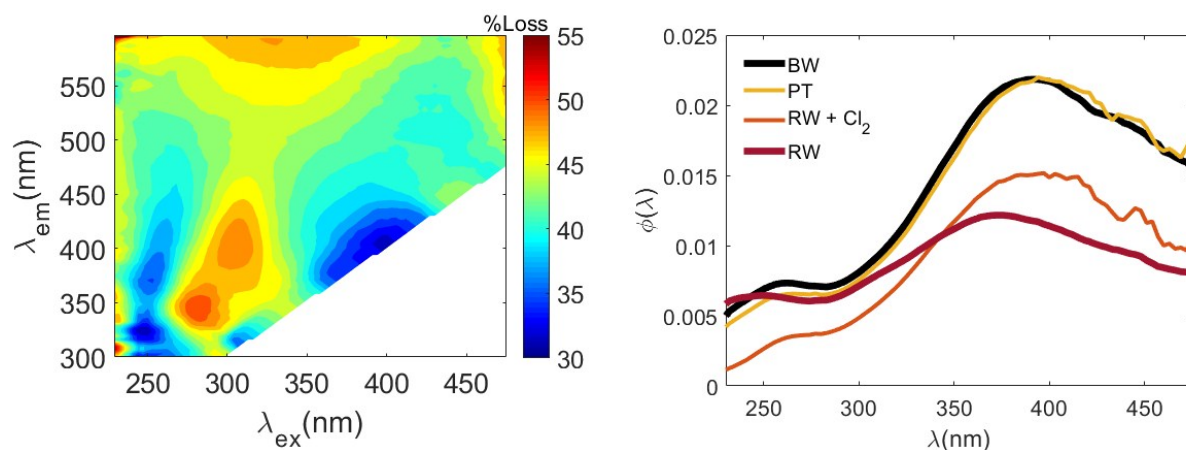

Figure S2. **(left)** Percent fluorescence loss between RW and PT samples. **(right)** Fluorescence apparent quantum yield spectra ( $\phi(\lambda)$ ) for RW (maroon line), PT (yellow line), RW +  $Cl_2$  (orange line) and BW (black line) samples.

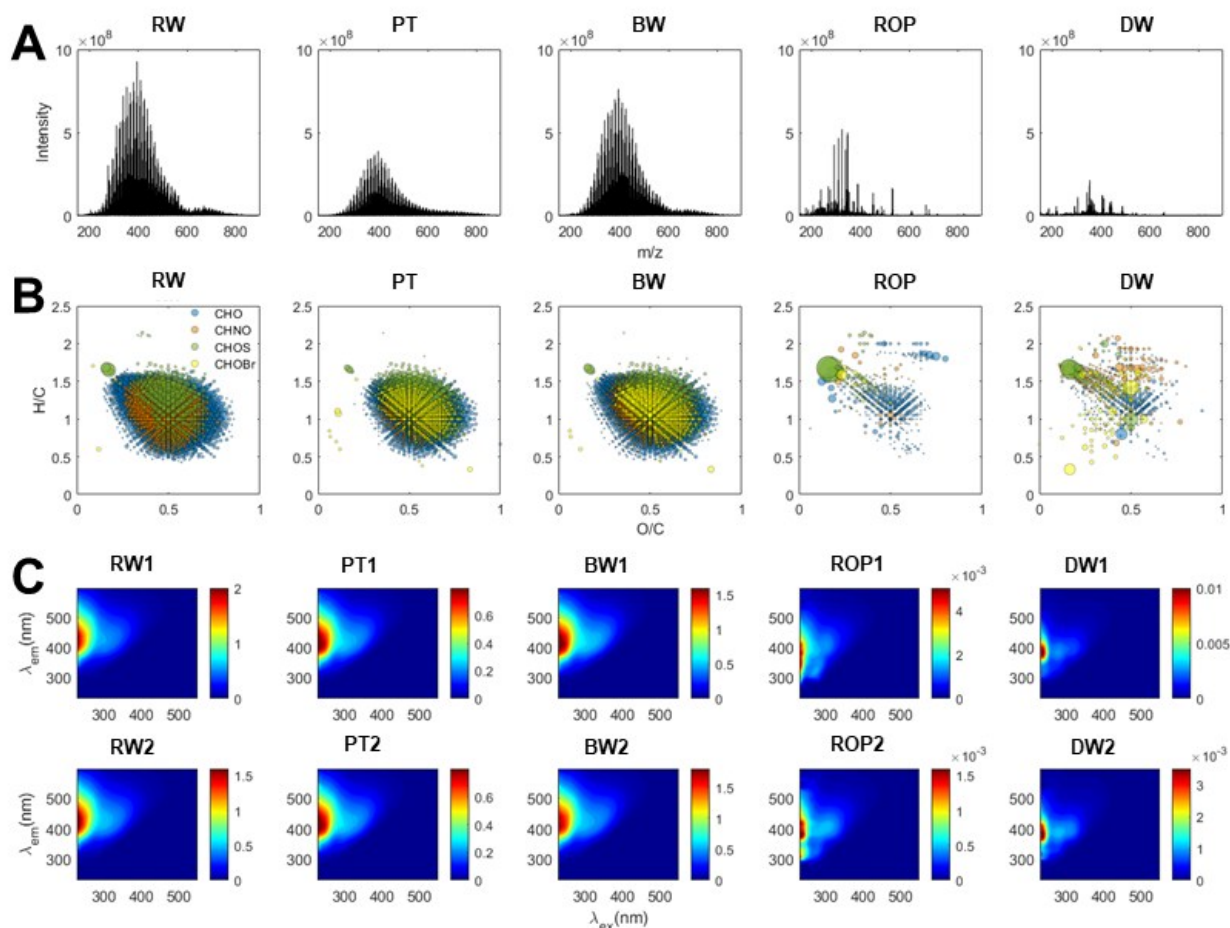

Figure S3. (A) FT-ICR-MS mass spectra of PPL extracts for various sample types (RW, PT, BW, ROP and DW) and (B) corresponding Van Krevelen diagrams (hydrogen to carbon ratio, H/C versus oxygen to carbon ratio, O/C) of assigned molecular formulas from (A). Blue dots are formulas containing only carbon, hydrogen and oxygen (CHO), orange dots are formulas containing CHO + nitrogen (CHNO), green dots are formulas containing CHO + sulfur (CHOS) and yellow dots are formulas containing CHO + bromine (CHOBr). (C) EEM spectra of SPE-DOM samples for PPL extracts (note the difference in scale between samples are replicates), highlighting that this SPE technique captures the majority of the features in EEM spectra prior to extraction (Figure 1).



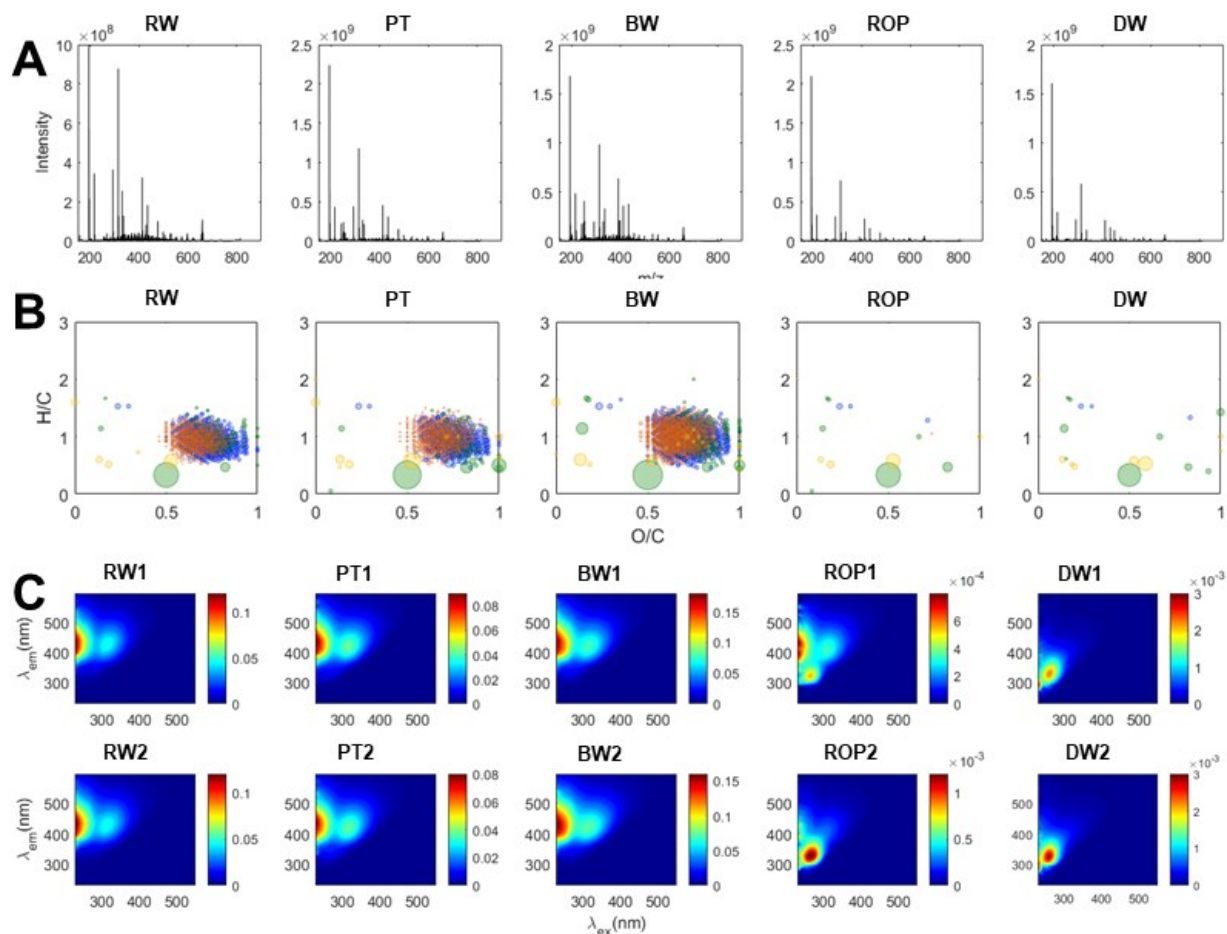

Figure S4. (A) FT-ICR-MS mass spectra of WAX extracts for various sample types (RW, PT, BW, ROP and DW) and (B) corresponding Van Krevelen diagrams (hydrogen to carbon ratio, H/C versus oxygen to carbon ratio, O/C) of assigned molecular formulas from (A). Blue dots are formulas containing only carbon, hydrogen and oxygen (CHO), orange dots are formulas containing CHO + nitrogen (CHNO), green dots are formulas containing CHO + sulfur (CHOS) and yellow dots are formulas containing CHO + bromine (CHOBr). (C) EEM spectra of SPE-DOM samples for WAX extracts (note the difference in scale between samples are replicates). While PPL does capture the majority of fluorescence features observed in water samples prior to extraction, (C) highlights additional fluorescence information that is gained from the WAX SPE-DOM samples.

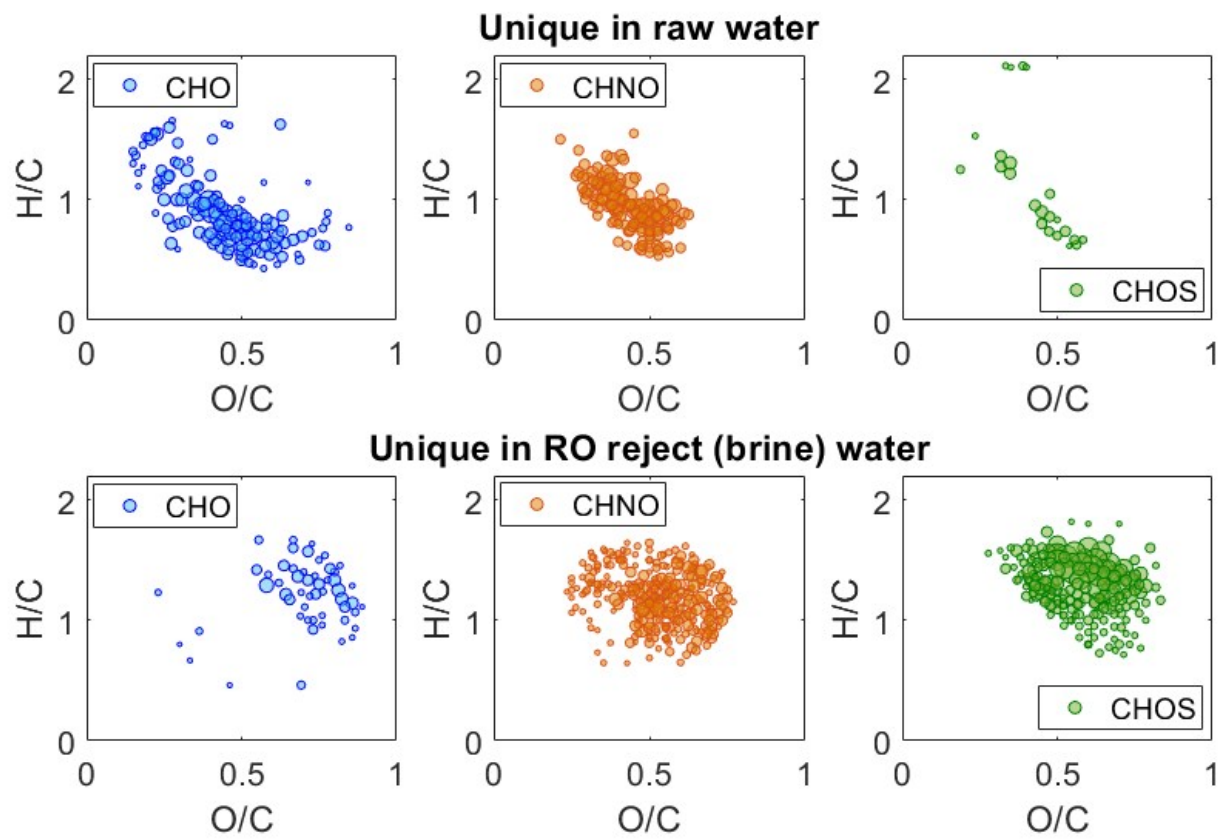

Figure S5. CHO (left, blue circles), CHNO (center, orange circles), and CHOS (right, green circles) that are unique in raw water PPL extracts (top) and those that are unique in reject (brine) water PPL extracts (bottom). Bubble size corresponds to molecular ion intensity.

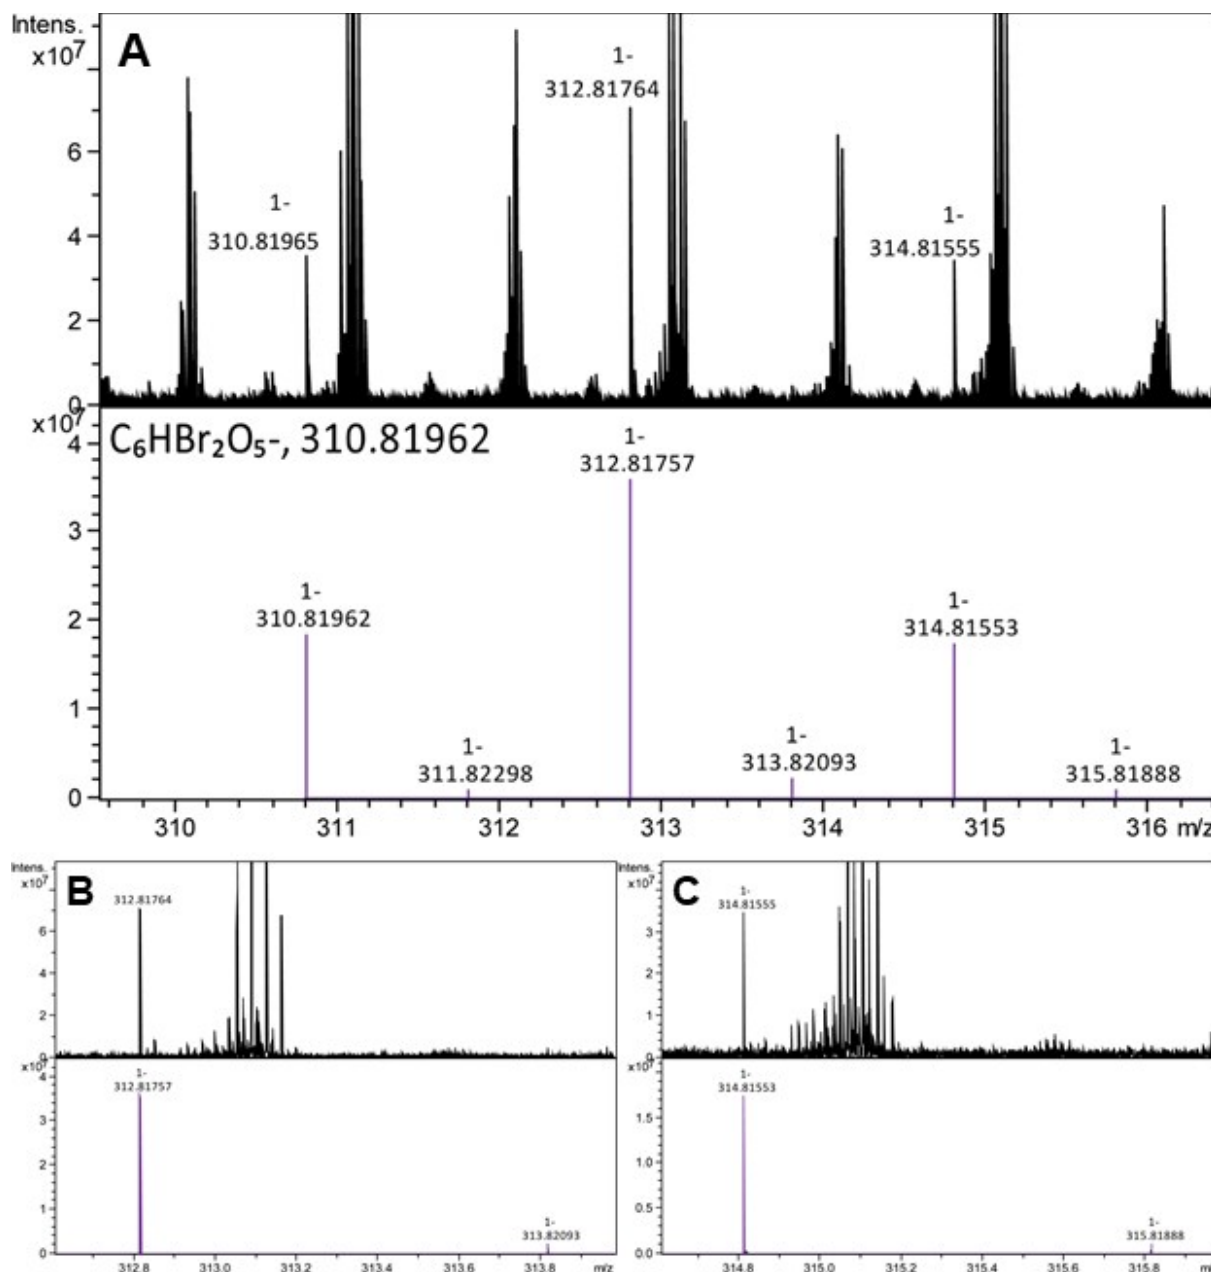

Figure S6. (A) Example of the isotope simulation of a brominated molecular ion ( $C_6HBr_2O_5^-$ , purple ions, bottom) in the reject (brine) water PPL extract (black ions, top) to confirm molecular formula assignments containing bromine. (B) and (C) are the same as (A), but show details of the  $C_6H^{79}Br^{81}BrO_5^-$  isotope (B) and the  $C_6H^{81}Br_2O_5^-$  isotope (C). This molecular ion in the PPL extract was further tested by Orbitrap MS/MS, whose result is in listed in Tables 2. Measured and predicted ionic masses and error are given below.

| (M-H) <sup>-</sup>        | Measured <i>m/z</i> | Predicted <i>m/z</i> | Error (ppm) |
|---------------------------|---------------------|----------------------|-------------|
| $C_6H^{79}Br_2O_5^-$      | 310.81965           | 310.81962            | 0.097       |
| $C_6H^{79}Br^{81}BrO_5^-$ | 312.81764           | 312.81757            | 0.224       |
| $C_6H^{81}Br_2O_5^-$      | 314.81555           | 314.81553            | 0.064       |

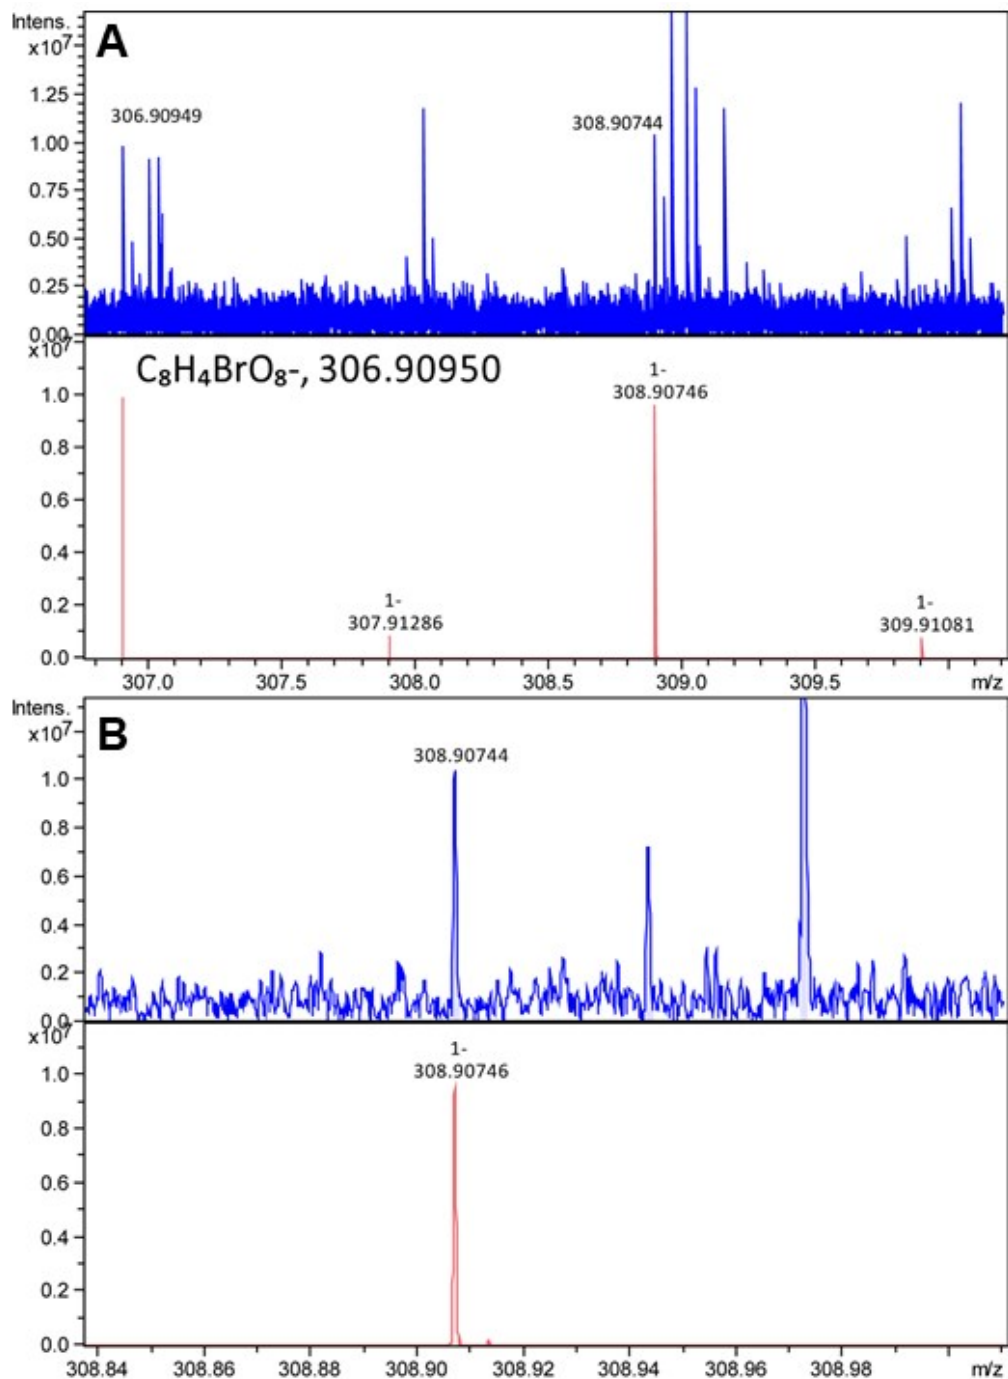

Figure S7. (A) Example of the isotope simulation of a brominated molecular ion ( $C_8H_4BrO_8^-$ , red ions, bottom) in the reject (brine) water WAX extract (blue ions, top) to confirm molecular formula assignments containing bromine. (B) shows the details of the  $C_8H_4^{81}BrO_8^-$  isotope. Measured and predicted ionic masses and error are given below.

| (M-H) <sup>-</sup>   | Measured <i>m/z</i> | Predicted <i>m/z</i> | Error (ppm) |
|----------------------|---------------------|----------------------|-------------|
| $C_8H_4^{79}BrO_8^-$ | 306.90949           | 306.9095             | 0.033       |
| $C_8H_4^{81}BrO_8^-$ | 308.90744           | 308.90746            | 0.065       |

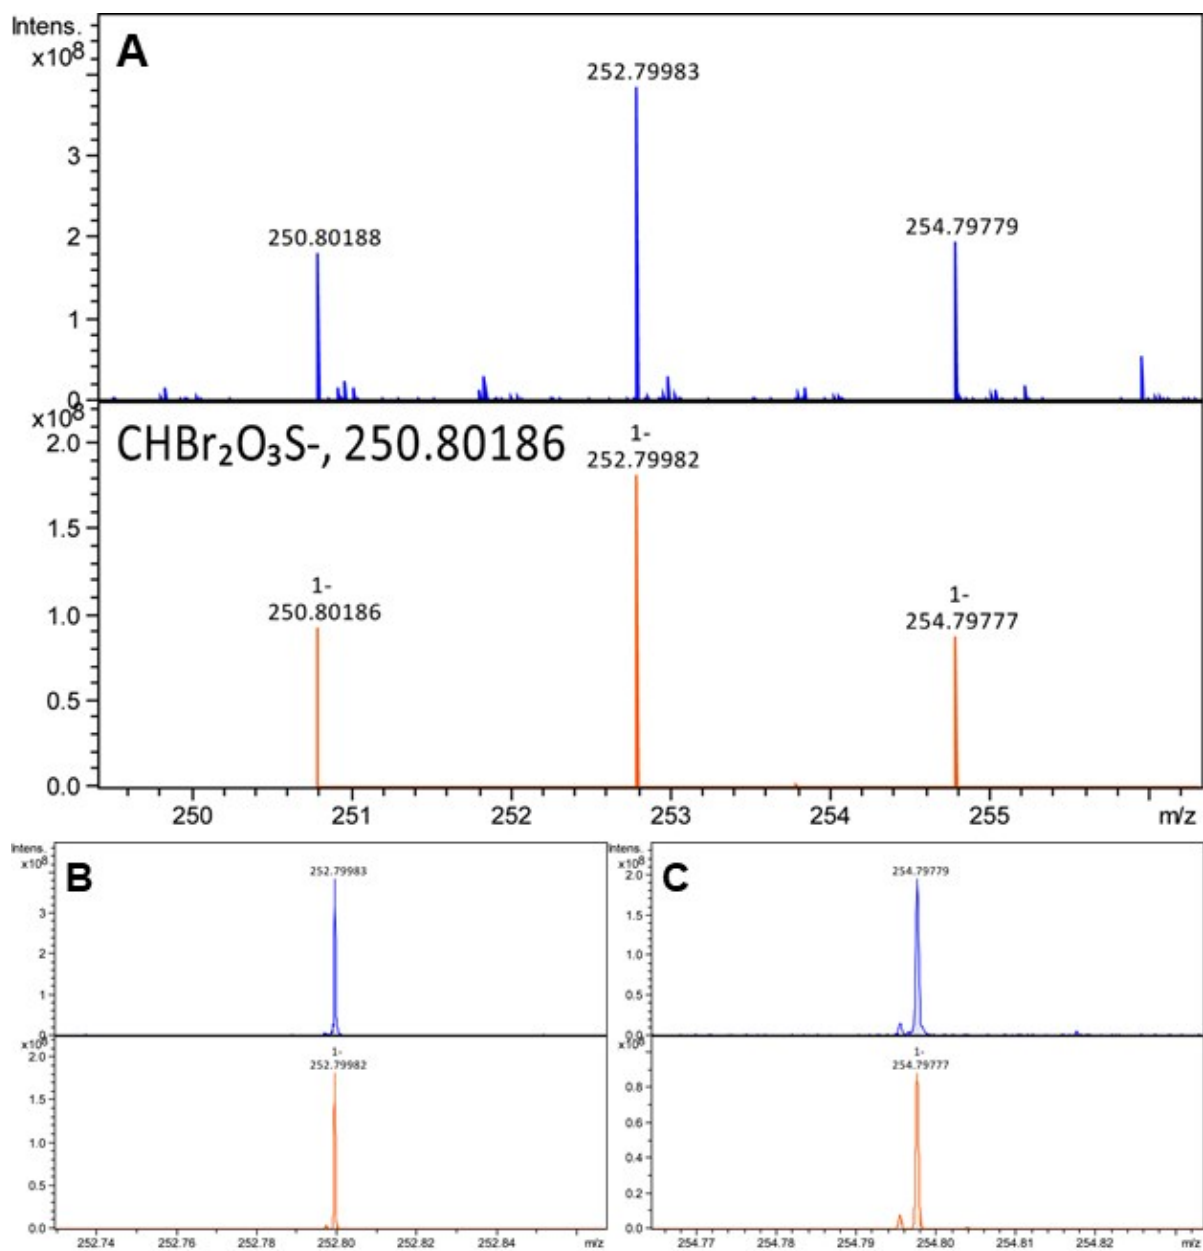

Figure S8. (A) Example of the isotope simulation of a molecular ion containing bromine and sulfur (CHBr<sub>2</sub>SO<sub>3</sub><sup>-</sup>, orange ions, bottom) in the reject (brine) water WAX extract (blue ions, top) to confirm molecular formula assignments containing bromine. (B) and (C) are the same as (A), but show details of the CH<sup>79</sup>Br<sup>81</sup>BrSO<sub>3</sub><sup>-</sup> isotope (B) and the CH<sup>81</sup>Br<sub>2</sub>SO<sub>3</sub><sup>-</sup> isotope (C). This molecular ion in the WAX extract was further tested by Orbitrap MS/MS, whose result is in listed in Tables 3. Measured and predicted ionic masses and error are given below.

| (M-H) <sup>-</sup>                                               | Measured <i>m/z</i> | Predicted <i>m/z</i> | Error (ppm) |
|------------------------------------------------------------------|---------------------|----------------------|-------------|
| CH <sup>79</sup> Br <sub>2</sub> SO <sub>3</sub> <sup>-</sup>    | 250.80188           | 250.80186            | 0.080       |
| CH <sup>79</sup> Br <sup>81</sup> BrSO <sub>3</sub> <sup>-</sup> | 252.79983           | 252.79982            | 0.040       |
| CH <sup>81</sup> Br <sub>2</sub> SO <sub>3</sub> <sup>-</sup>    | 254.79779           | 254.79777            | 0.079       |

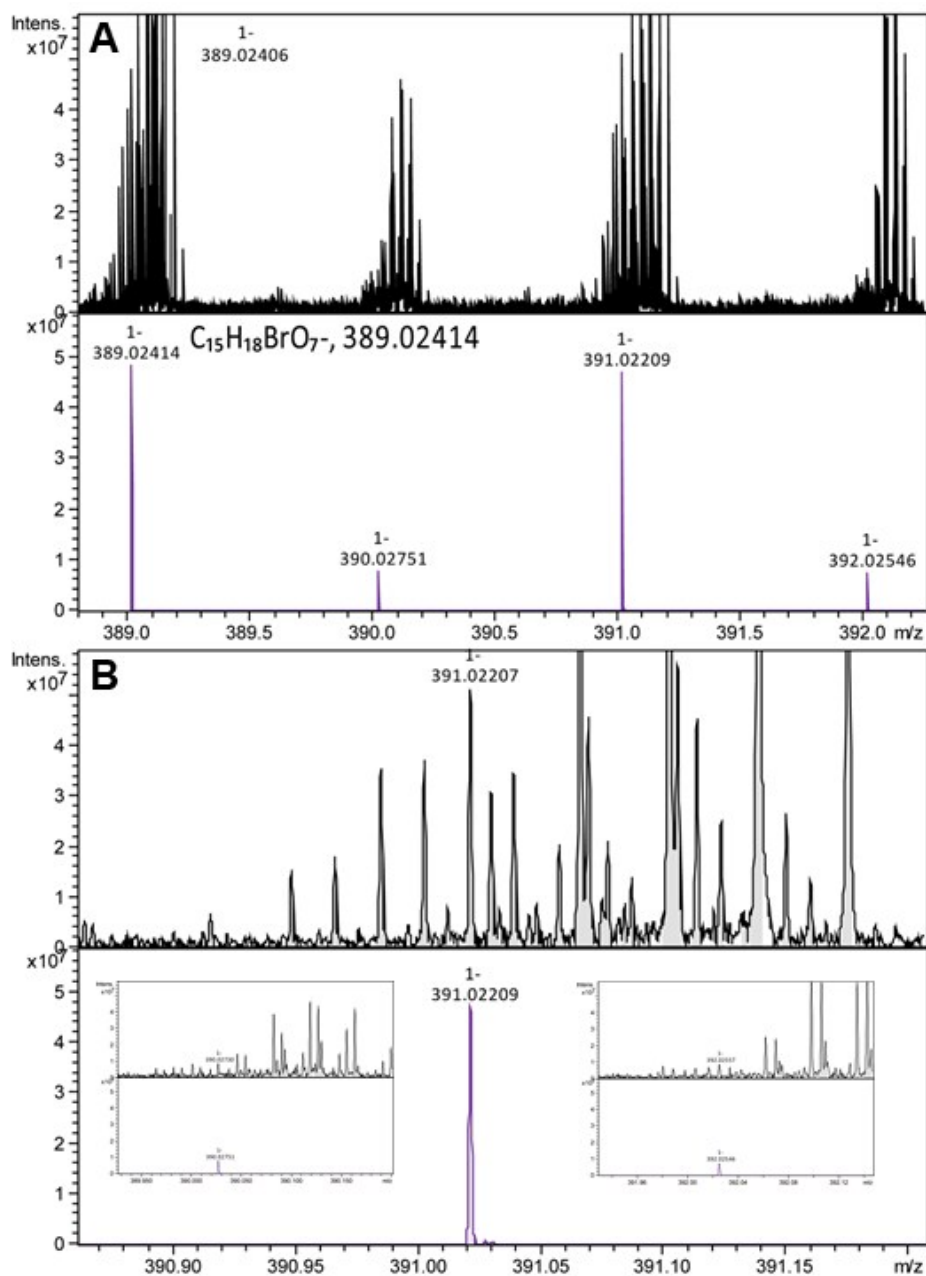

Figure S9. (A) Example of the isotope simulation of a brominated molecular ion ( $C_{15}H_{18}BrO_7^-$ , purple ions, bottom) in the reject (brine) water PPL extract (black ions, top). This simulation is used to confirm this molecular formula assignments containing bromine and without a negative mass defects (e.g. more saturated formulas). (B) shows the details of the  $C_{15}H_{18}^{81}BrO_7^-$  isotope and insets in (B) show the  $^{13}C$  isotopes. Measured and predicted ionic masses and error are given below.

| (M-H) <sup>-</sup>         | Measured <i>m/z</i> | Predicted <i>m/z</i> | Error (ppm) |
|----------------------------|---------------------|----------------------|-------------|
| $C_{15}H_{18}^{79}BrO_7^-$ | 389.02406           | 389.02414            | 0.206       |
| $C_{15}H_{18}^{81}BrO_7^-$ | 391.02207           | 391.02209            | 0.051       |

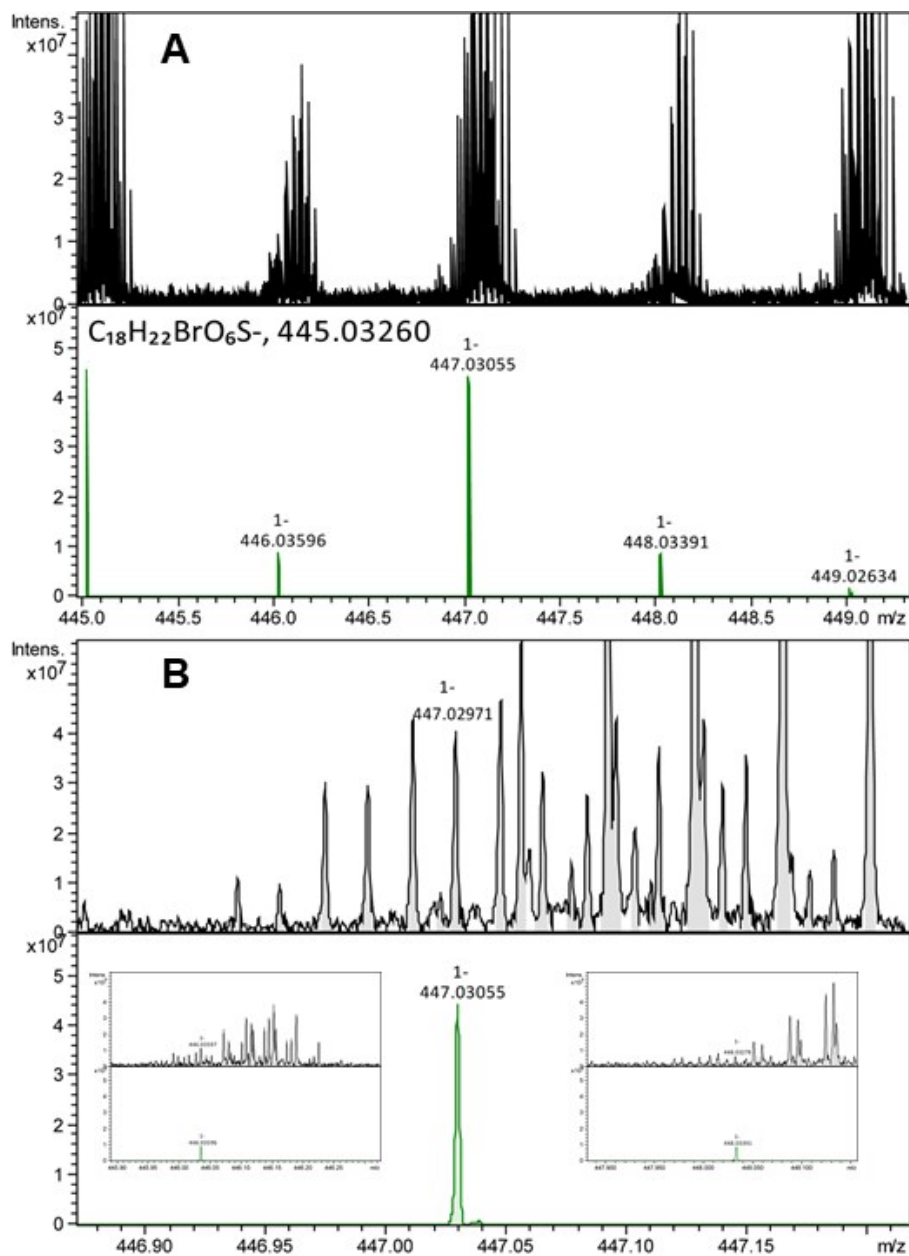

Figure S10. (A) Example of the isotope simulation of a molecular ion containing bromine and sulfur ( $C_{18}H_{22}BrSO_6^-$ , green ions, bottom) in the reject (brine) water PPL extract (black ions, top). This simulation is used to confirm this molecular formula assignments containing bromine and without a negative mass defects (e.g. more saturated formulas). (B) shows the details of the  $C_{18}H_{22}^{81}BrSO_6^-$  isotope and insets in (B) show the  $^{13}C$  isotopes. Measured and predicted ionic masses and error are given below.

| (M-H) <sup>-</sup>          | Measured $m/z$ | Predicted $m/z$ | Error (ppm) |
|-----------------------------|----------------|-----------------|-------------|
| $C_{18}H_{22}^{79}BrSO_6^-$ | 445.0327       | 445.03260       | 0.165       |
| $C_{18}H_{22}^{81}BrSO_6^-$ | 447.0297       | 447.03055       | 1.88        |

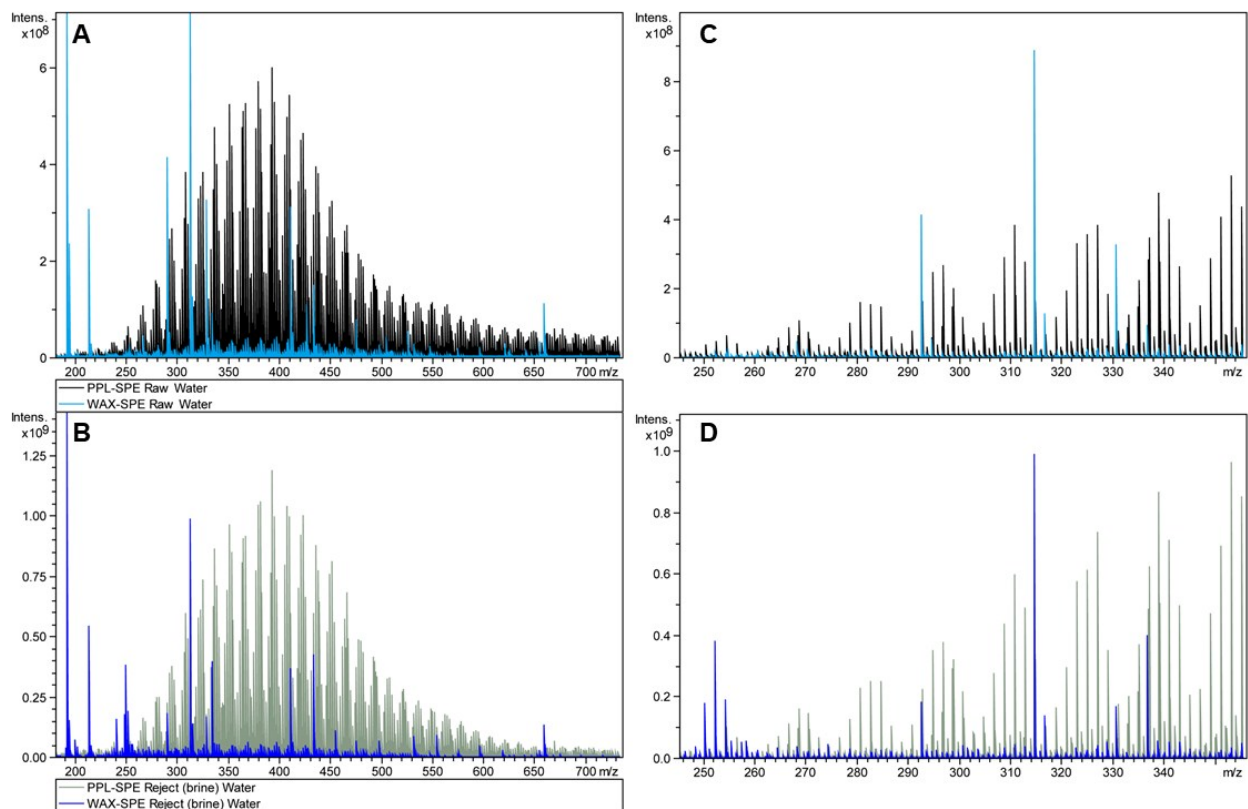

Figure S11. **(A)** FT-ICR mass spectra of raw water extracted by PPL-SPE (black ions) followed by WAX-SPE (light blue ions) and **(B)** FT-ICR mass spectra of RO reject (brine) water extracted by PPL-SPE (gray ions) followed by WAX-SPE (blue ions). **(C)** and **(D)** are FT-ICR mass spectra plotted from 250 to 350  $m/z$  for raw water and reject water, respectively. Same colors as **(A)** and **(B)** apply.



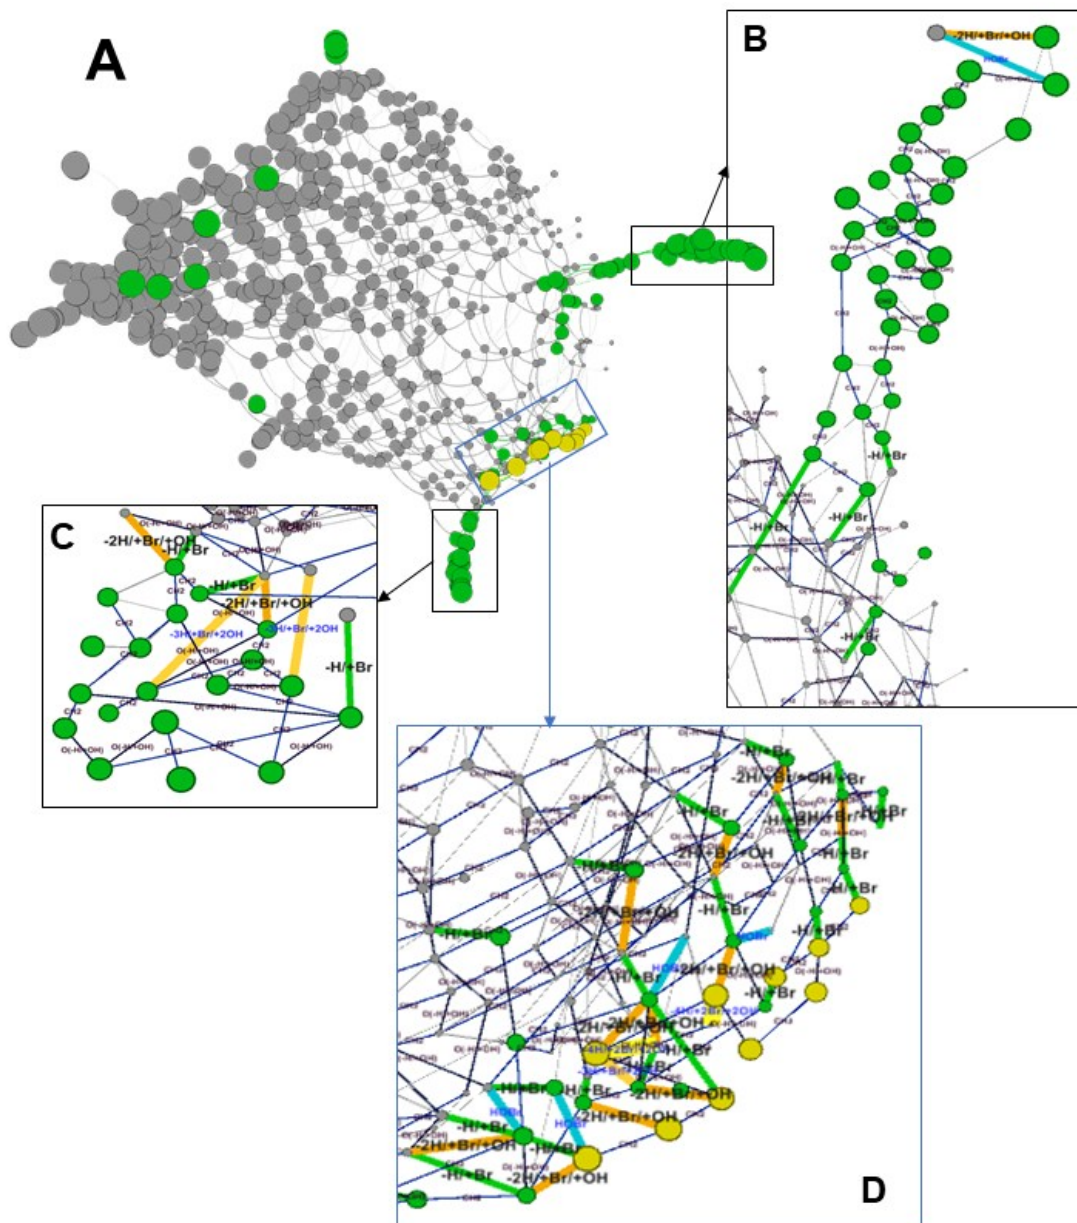

Figure S12. **(A)** Mass difference network analysis of all CHOS (gray circles) in RW, PT, and BW PPL extracts and CHOSBr (green circles) and CHOSBr<sub>2</sub> (yellow circles) in PT and BW PPL extracts to see if substitution reactions (-H/+Br, green lines), substitution + hydroxylation (e.g. -2H/+Br/+OH, orange and yellow lines) or addition reactions (HOBr, blue lines lines) might explain the formation of Br-DBPs in PT and BW samples. Bubble size corresponds to *m/z* value. **(B and C)** highlight pools of CHOSBr formulas that could not be explained by substitution or addition reactions since there are only a few transitions between CHOS and CHOSBr. **(D)** highlights a pool with many -H/+Br transitions and these formulas are in line with the bromination of suspected surfactant metabolites (sulfophenyl carboxylic acids, SPCs). The pool in **(D)** was further tested by mass difference network analysis and those results are shown in Figure 4 and in Figure S13.

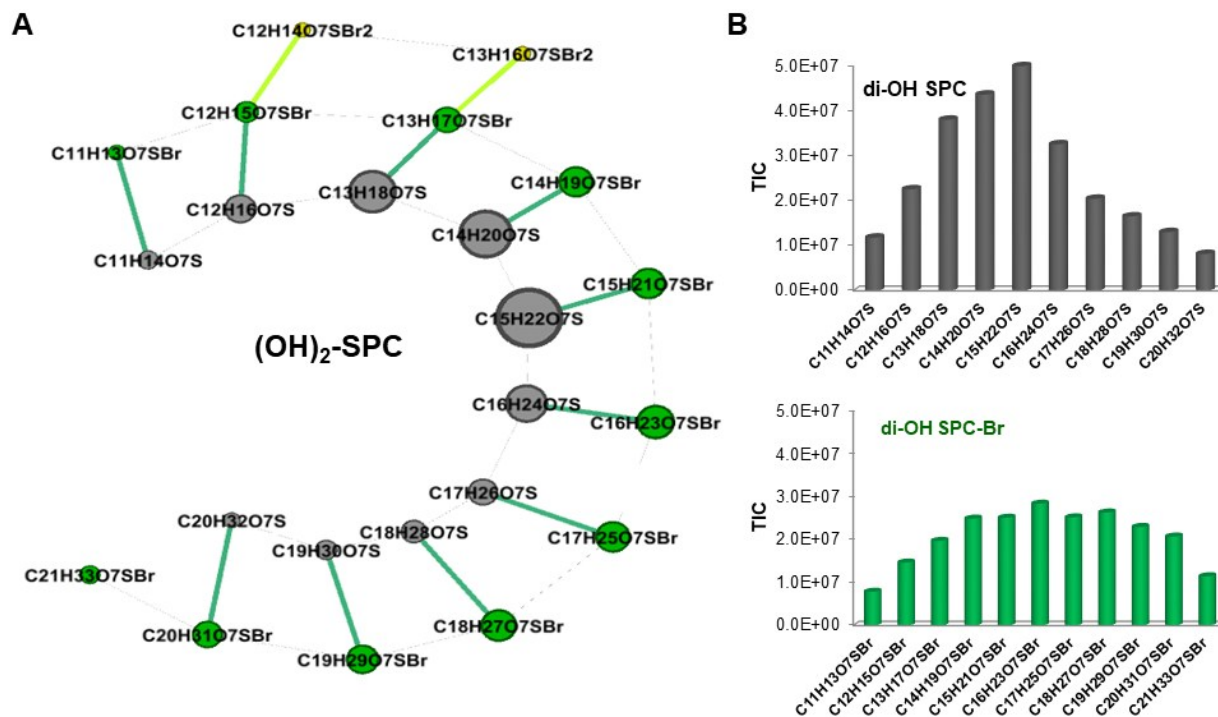

Figure S13. **(A)** Mass difference network analysis of CHOS formulas that match formulas for sulfophenyl carboxylic acids (SPCs) with 2 hydroxylations (+2OH) on the aromatic ring (gray circles) in RW, PT, and BW PPL extracts and CHOSBr formulas (green circles) in PT and BW PPL extracts to see if substitution reactions (H for Br, green lines) might explain the formation of Br-DBPs in PT and BW samples. Yellow lines are also a transition of  $-H/+Br$  to CHOSBr<sub>2</sub> (yellow circles) molecular formulas **(B)** Total ion count (TIC) versus homologous series (formulas spaced by CH<sub>2</sub>) of CHOS formulas (gray, top) and CHOSBr formulas (green, bottom) in the network displayed in **(A)**.
